# Supplementary material for: Design and synthesis of a family of 1D-lanthanide-coordination polymers showing luminescence and slow relaxation of the magnetization
Source: Royal Society of Chemistry journal article supplement (doi:10.1039/c8dt02592d), 2018-01-01
Supplement: c8dt02592d1.pdf [file c8dt02592d1.pdf]

Supporting Information for:

## **Design and Synthesis of a Family of 1D-Lanthanide-Coordination Polymers Showing Luminescence and Slow Relaxation of the Magnetization**

Ana Belén Ruiz-Muelle,<sup>a</sup> Amalia García-García,<sup>b</sup> Antonio A. García-Valdivia,<sup>b</sup> Itziar Oyarzabal,<sup>c</sup> Javier Cepeda,<sup>c</sup> José M. Seco,<sup>c</sup> Enrique Colacio,<sup>b</sup> Antonio Rodríguez-Diéguez<sup>b</sup> and Ignacio Fernández<sup>a,\*</sup>

<sup>a</sup> Department of Chemistry and Physics, Research Centre CIAIMBITAL, University of Almería, Ctra. Sacramento s/n, 04120 Almería, Spain. <sup>b</sup> Departamento de Química Inorgánica, Facultad de Ciencias, Universidad de Granada, 18071 Granada, Spain. <sup>c</sup> Departamento de Química Aplicada, Facultad de Química, Universidad del País Vasco (UPV/EHU), 20018 Donostia, Spain.

### Contents:

- S1. FT-IR (KBr) spectrum of Haapc (**1**).
- S2. <sup>1</sup>H NMR spectrum of Haapc (**1**) at room temperature.
- S3. <sup>13</sup>C NMR (bottom) and DEPT-135 (top) NMR spectra of Haapc (**1**) at room temperature.
- S4. COSY spectrum of Haapc (**1**) at room temperature.
- S5. <sup>1</sup>H, <sup>13</sup>C gHMQC spectrum of Haapc (**1**) at room temperature.
- S6. <sup>1</sup>H, <sup>13</sup>C gHMBC spectrum of Haapc (**1**) at room temperature.
- S7. FT-IR (KBr) spectrum of complex **2**.
- S8. <sup>1</sup>H NMR spectrum of complex **2** at 333 K.
- S9. 1D-gTOCSY spectrum of complex **2** at 333 K.
- S10. <sup>13</sup>C NMR (bottom) and DEPT-135 (top) NMR spectra of complex **2** at 333 K.
- S11. <sup>1</sup>H, <sup>13</sup>C gHMBC spectrum of complex **2** at 333 K.
- S12. Diffusion NMR Details studies of ligand Haapc (**1**) and complex **2**.
- S13. Structural details of compound **8**.
- S14. Continuous shape measures (CShMs)
- S15. Powder X-ray Data Collection.
- S16. Photoluminescence measurements.
- S17. Ac susceptibility measurements.
- S18. Magneto-caloric effect for gadolinium compound.

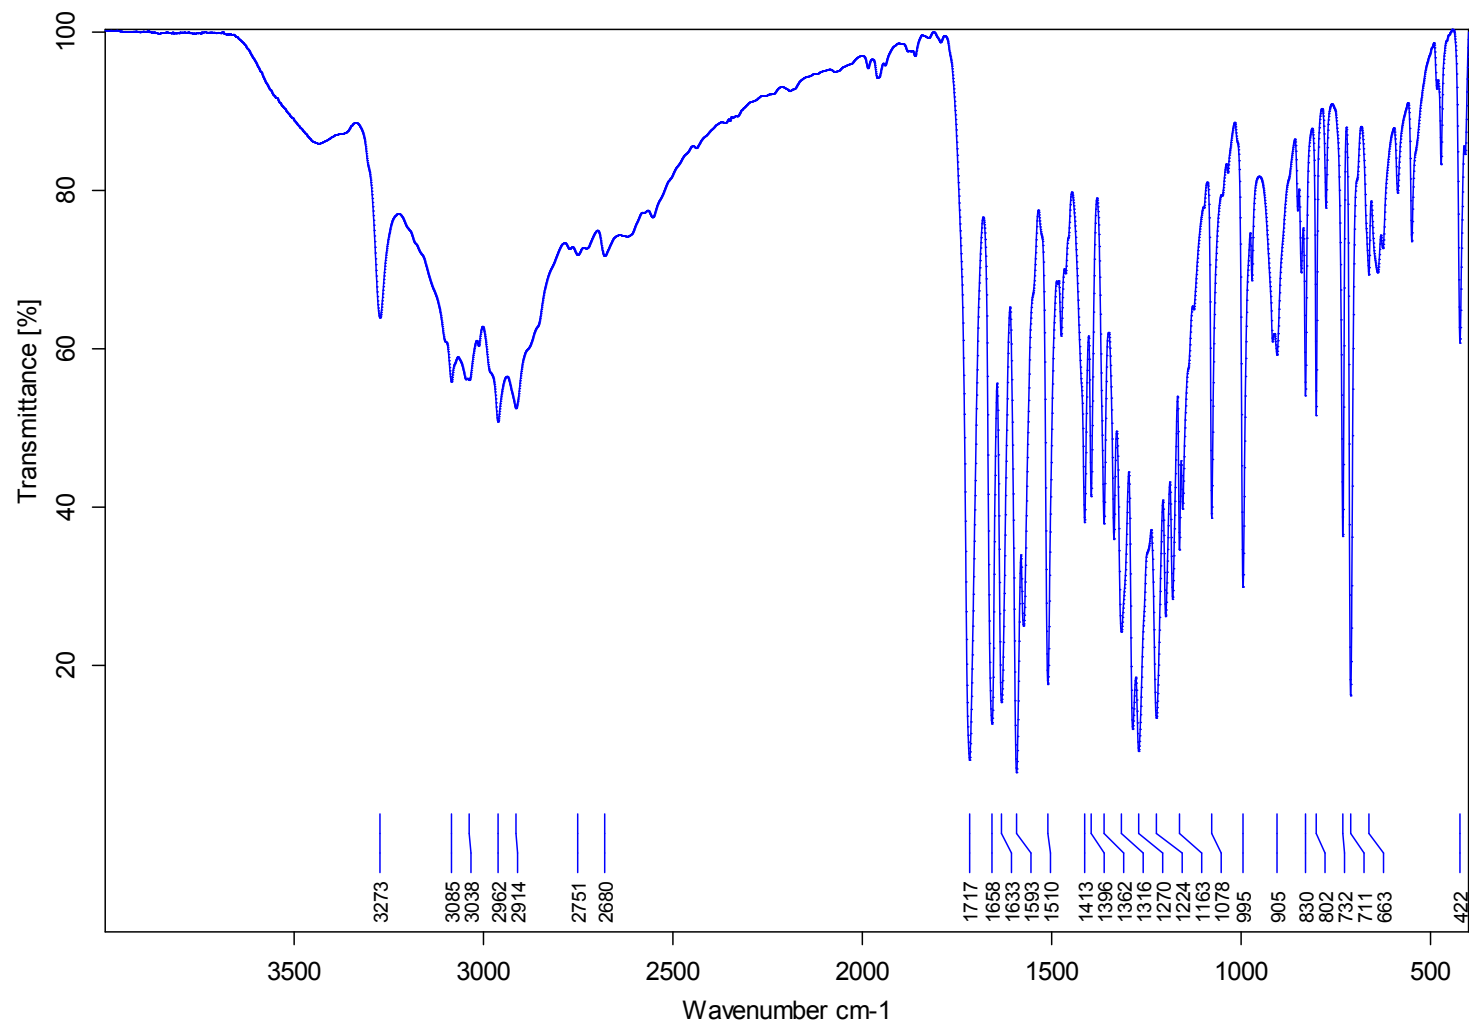

**Figure S1.** FT-IR (KBr) spectrum of **1**.

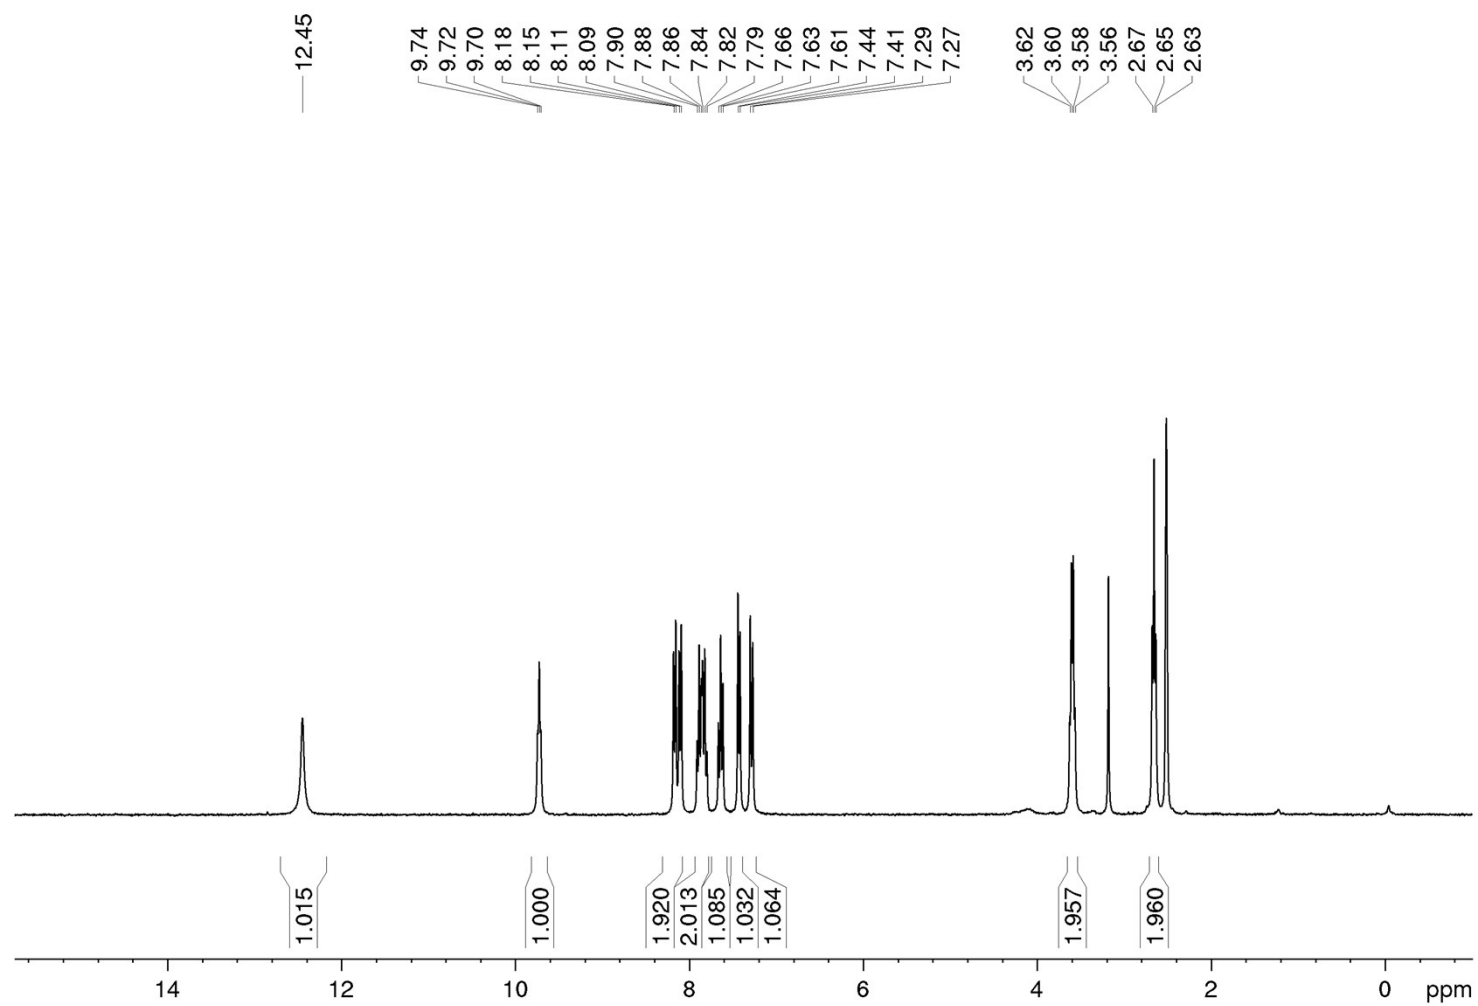

**Figure S2.** <sup>1</sup>H NMR spectrum of **1** in DMSO-*d*<sub>6</sub> at room temperature (300.13 MHz).

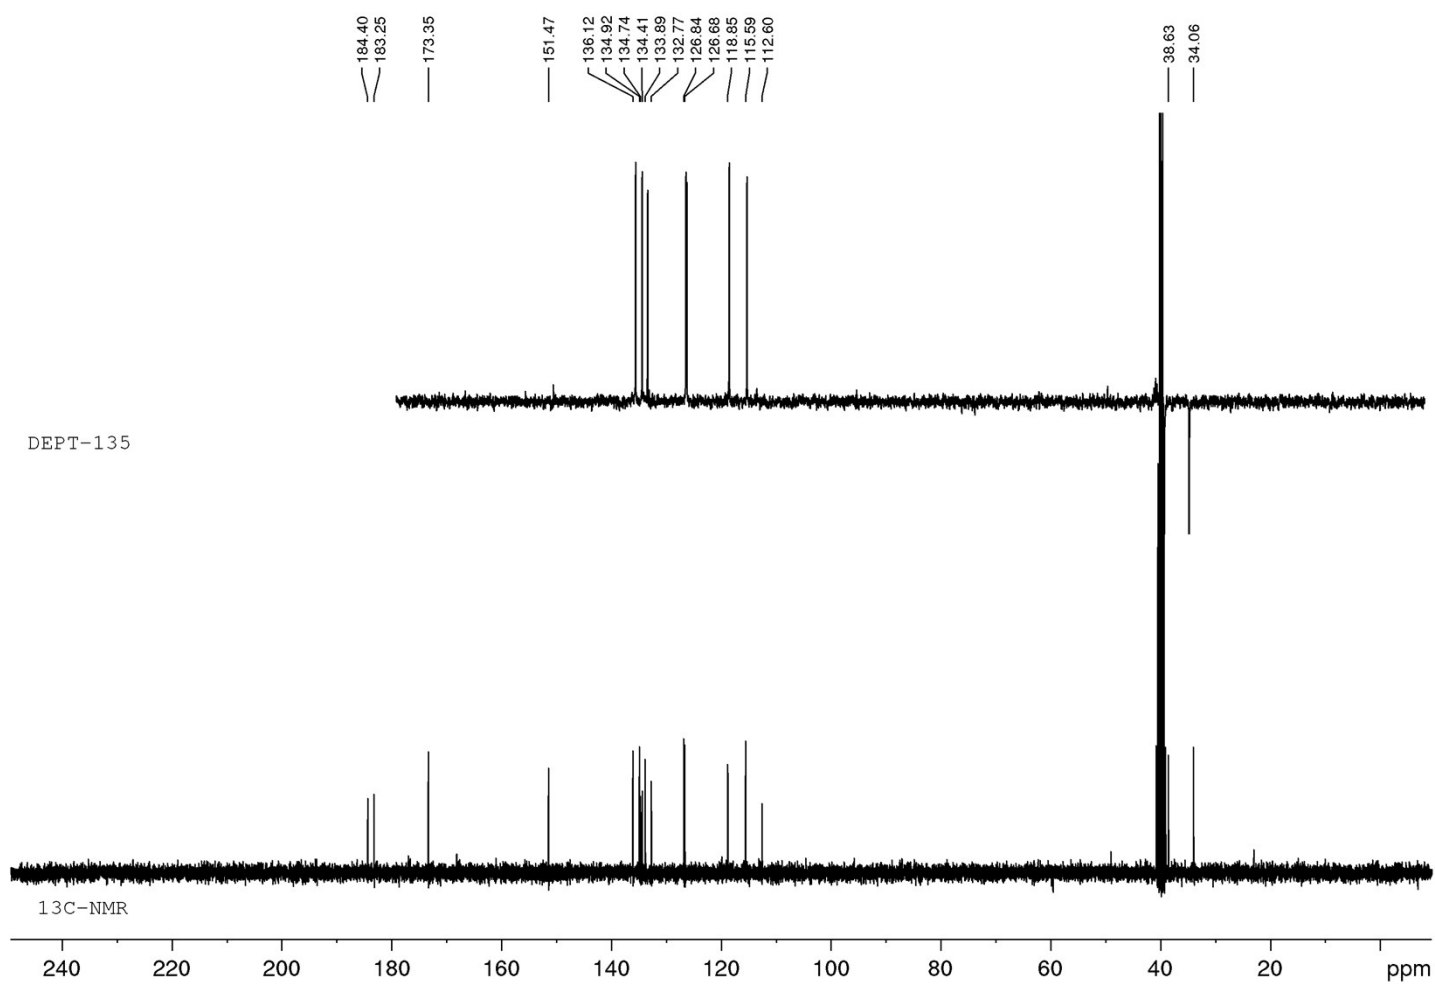

**Figure S3.** <sup>13</sup>C NMR (bottom) and DEPT-135 (top) NMR spectra of **1** in DMSO-*d*<sub>6</sub> at room temperature (75.47 MHz).

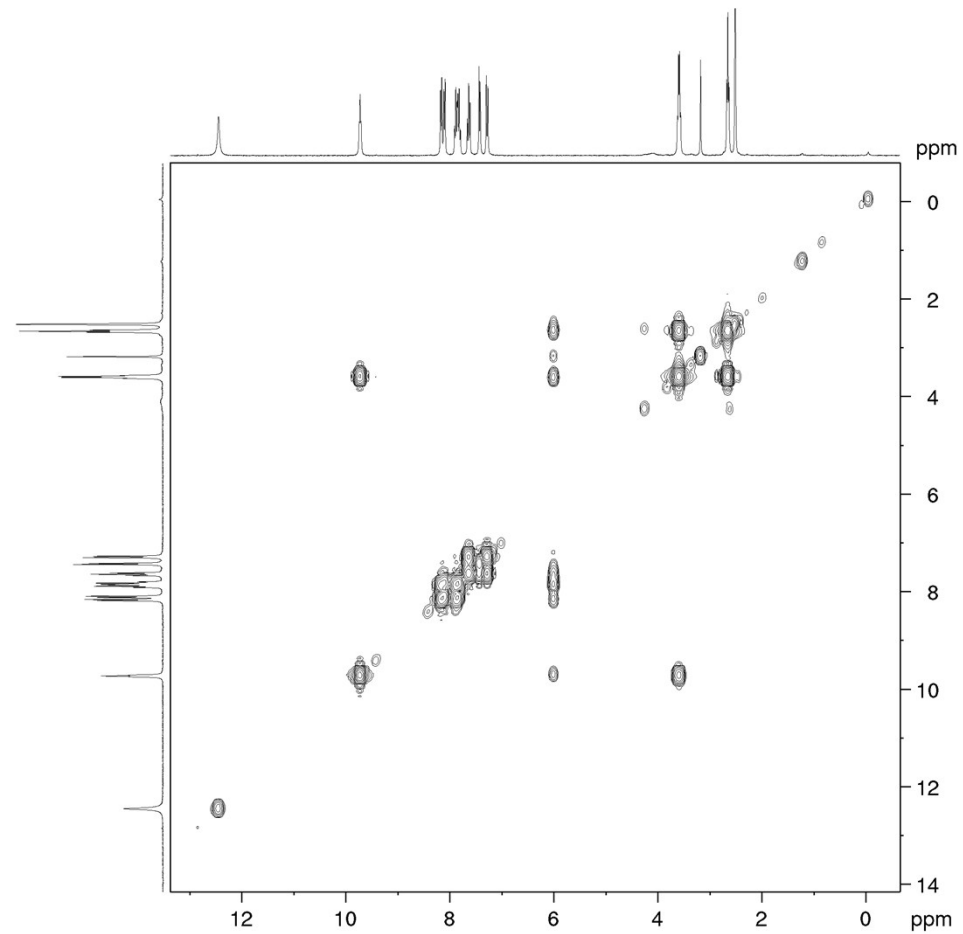

**Figure S4.** COSY spectrum of **1** in DMSO- $d_6$  at room temperature.

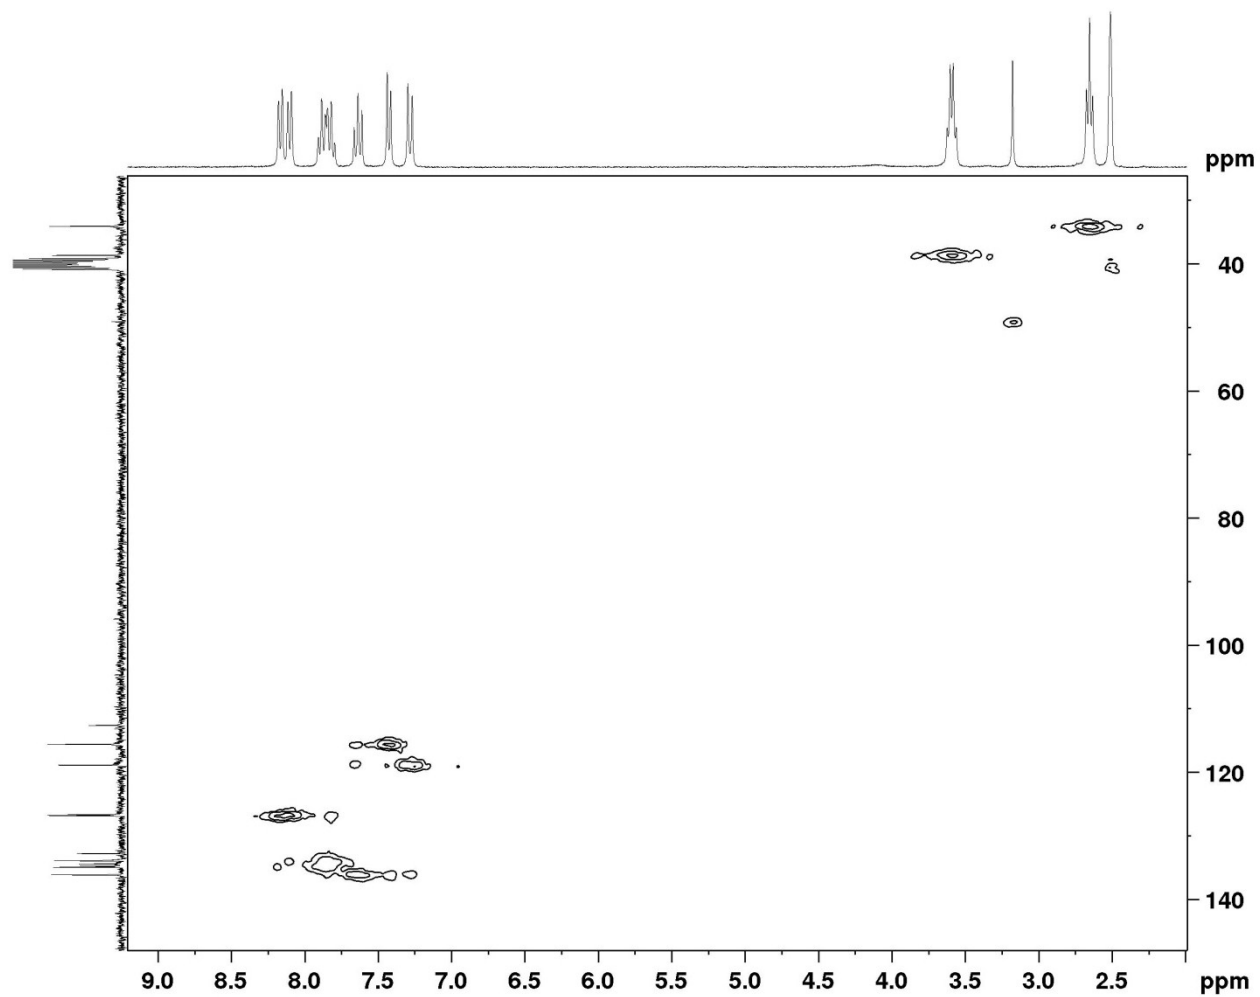

**Figure S5.**  $^1\text{H}$ ,  $^{13}\text{C}$  gHMQC spectrum of **1** in  $\text{DMSO}-d_6$  at room temperature.

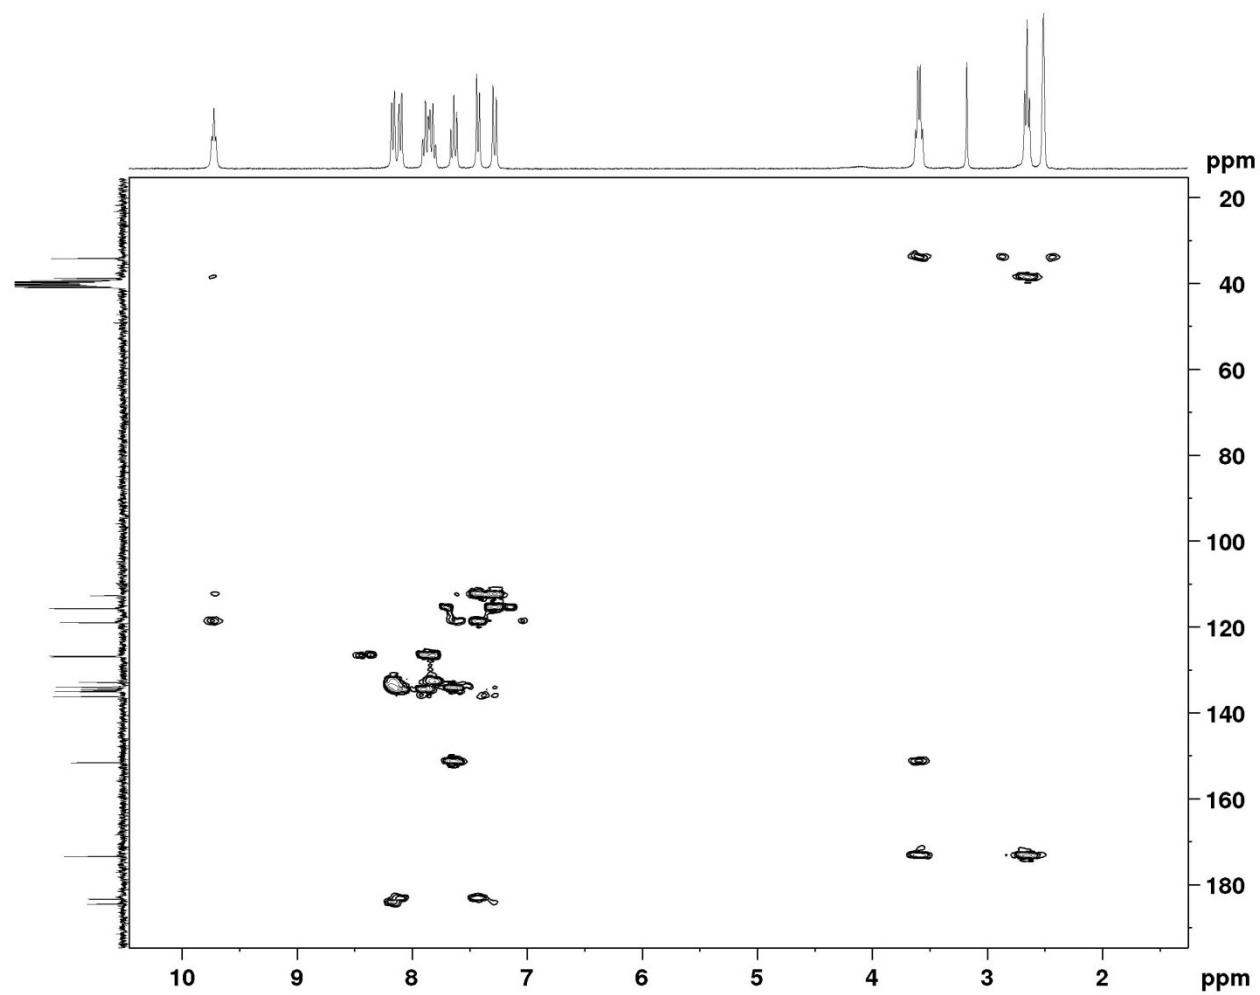

**Figure S6.**  $^1\text{H}$ ,  $^{13}\text{C}$  gHMBC spectrum of **1** in  $\text{DMSO}-d_6$  at room temperature.

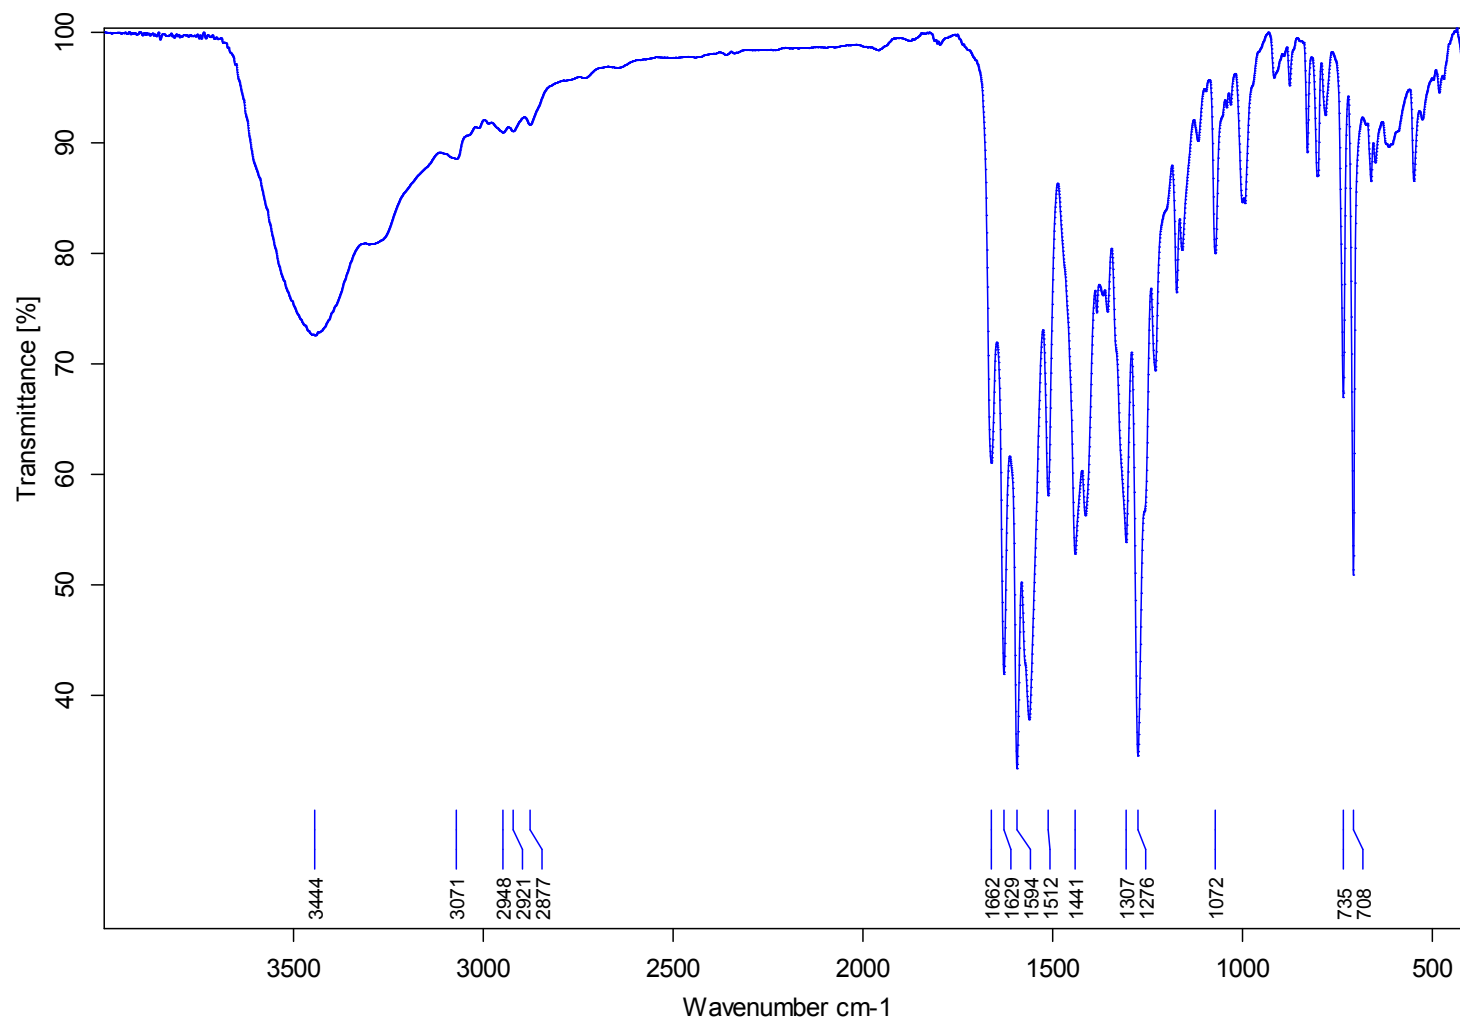

**Figure S7.** FT-IR (KBr) spectrum of complex 2.



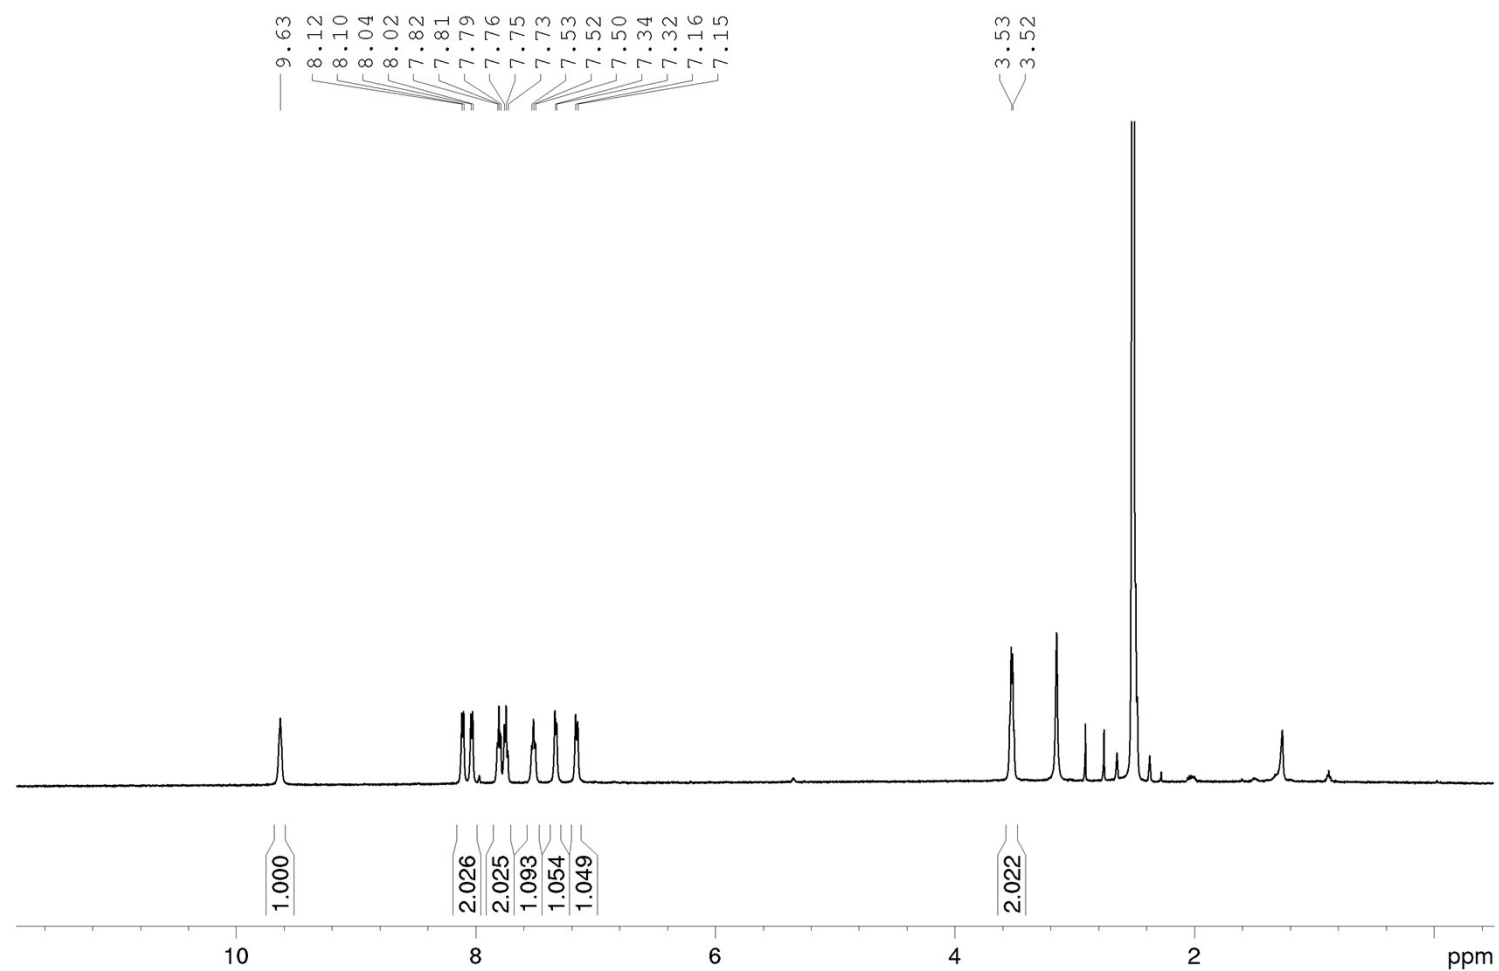

**Figure S8.**  $^1\text{H}$  NMR spectrum of complex **2** in  $\text{DMSO-}d_6$  at 333 K (500.13 MHz).

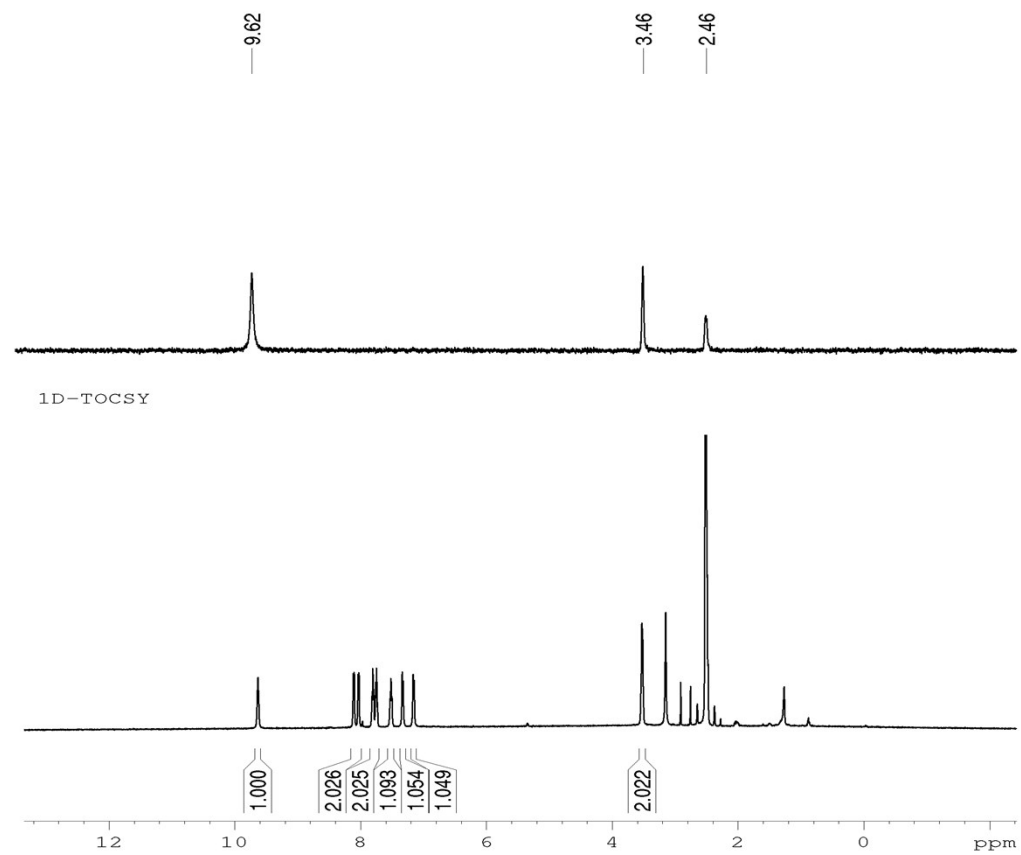

**Figure S9.** 1D-gTOCSY spectrum of complex **2** in DMSO- $d_6$  at 333 K.

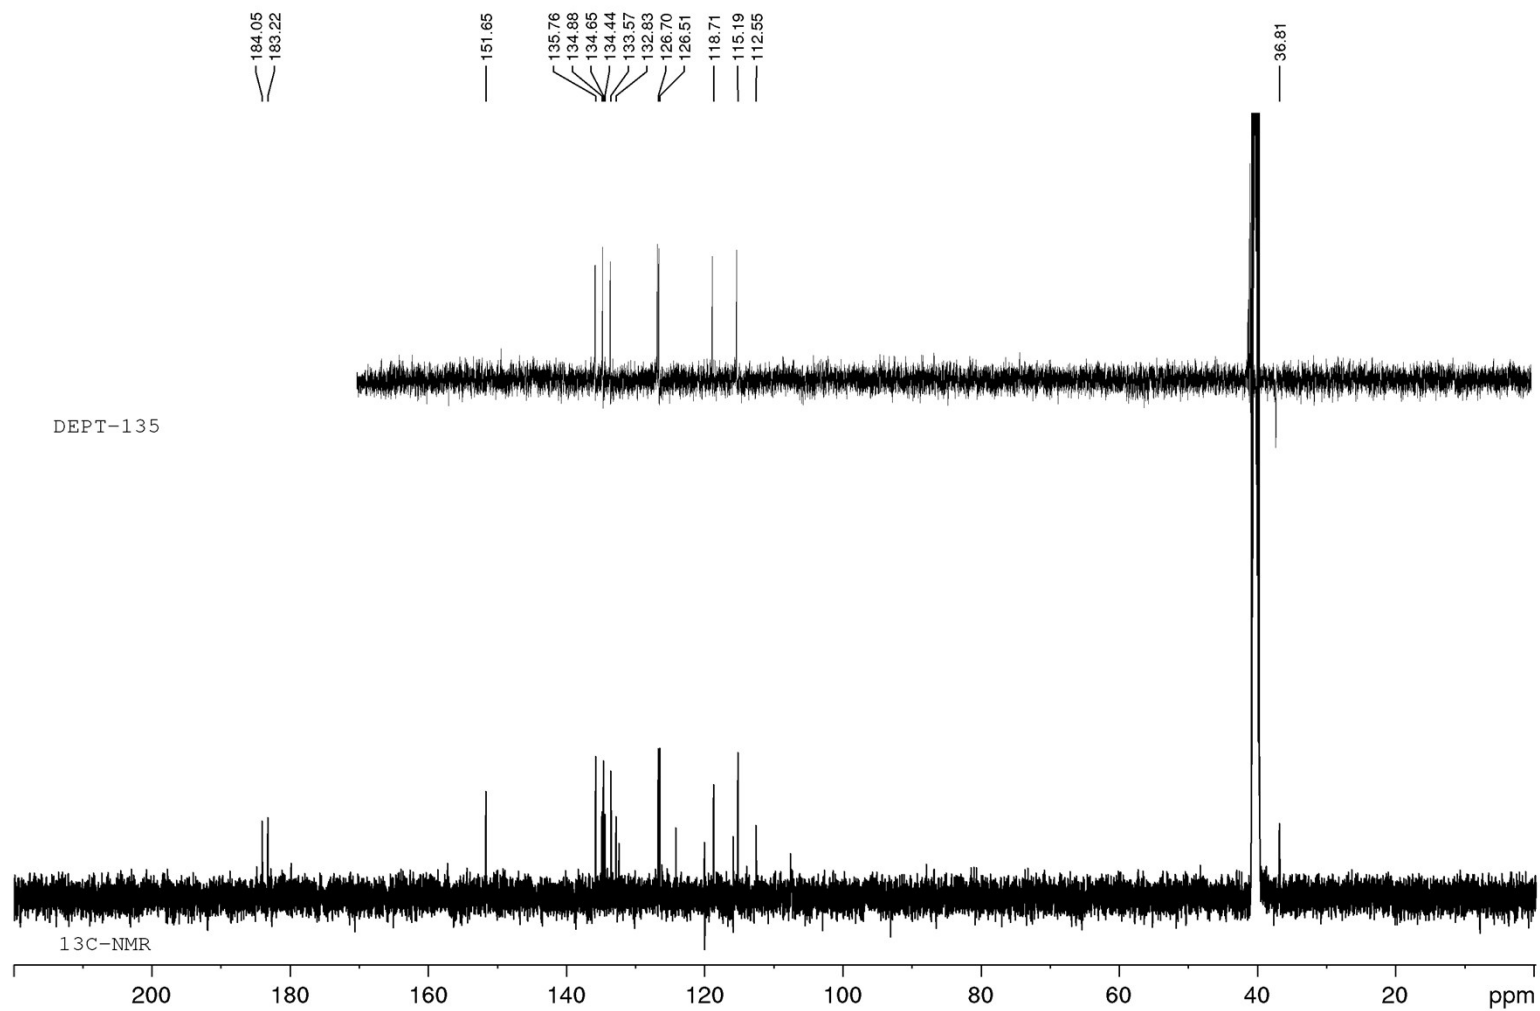

**Figure S10.**  $^{13}\text{C}$  NMR (bottom) and DEPT-135 (top) NMR spectra of complex **2** in  $\text{DMSO}-d_6$  at 333 K (126 MHz).

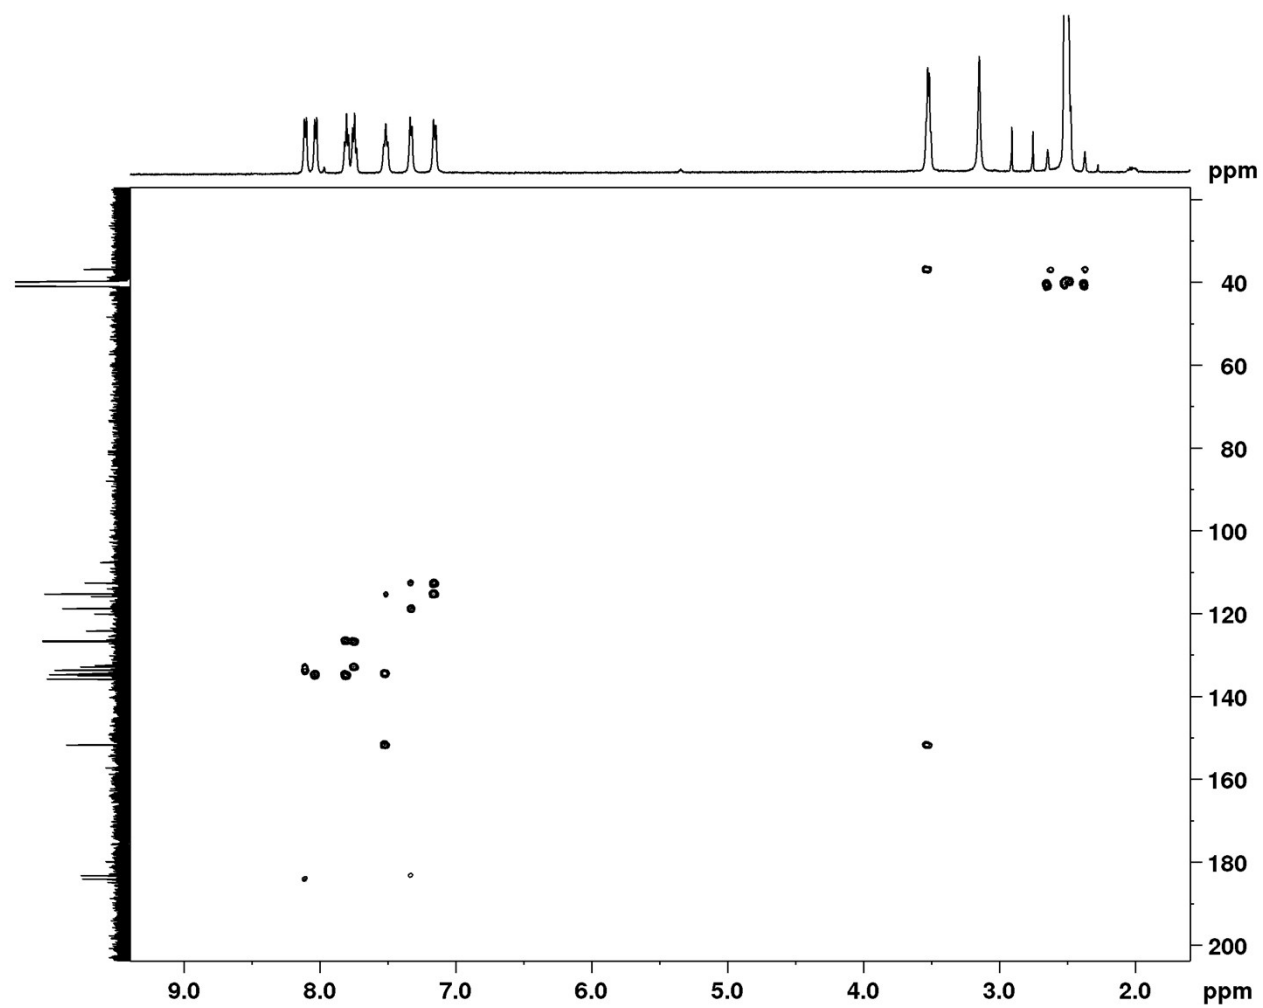

**Figure S11.**  $^1\text{H}$ ,  $^{13}\text{C}$  gHMBC spectrum of complex **2** in  $\text{DMSO}-d_6$  at 333 K.

## S12. Diffusion NMR Details studies.

PGSE NMR diffusion measurements were carried out using the stimulated echo sequence and monopolar pairs pulses (stegp).<sup>1</sup> A sine shape was used for the gradient pulses and their strength varied automatically in the course of the experiments. The  $D$  values were determined from the slope of the regression line  $\ln(I/I_0)$  versus  $G^2$ , according to the following equation, and employing the DiffAtOnce package.<sup>2</sup>  $I/I_0$  = observed spin echo intensity/intensity without gradients,  $G$  = gradient strength,  $\Delta$  = delay between the midpoints of the gradients,  $D$  = diffusion coefficient,  $\delta$  = gradient length.

$$\ln\left(\frac{I}{I_0}\right) = -(\gamma\delta)^2 \left(\Delta - \frac{\delta}{4}\right) D \frac{4}{\pi^2} G^2$$

The measurements were carried out without spinning. Gradient calibration was carried out by means of a diffusion measurement of HDO in D<sub>2</sub>O ( $D(\text{HDO}) = 1.902 \cdot 10^{-9} \text{ m}^2 \text{ s}^{-1}$ ).<sup>3</sup> To check reproducibility, three different measurements with different diffusion parameters ( $\delta$  and/or  $\Delta$ ) were always carried out. The experimental error in  $D$  values was estimated to be smaller than  $\pm 2\%$ . All of the data leading to the reported  $D$  values afforded lines whose correlation coefficients were above 0.999 and 8 to 12 points were used for regression analysis. To check reproducibility, three different measurements with different diffusion parameters ( $\delta$  and/or  $\Delta$ ) were always carried out. The gradient strength was incremented in 4–8% steps from 2–10% to 98% so that, depending on signal: noise, 12–25 points could be used for regression analysis. The recovery delay was set to 5 times  $T_1$ . All diffusion processing and molecular size estimation were performed by using the DiffAtOnce software package available at [www.diffatonce.com](http://www.diffatonce.com).

### S13. Structural details of compound 8.

**Table S1.** Structural parameters (Å, °) of  $\pi$ - $\pi$  interactions of compound 8.<sup>a</sup>

| Ring...Ring <sup>b</sup> | $\alpha$ | DC       | $\beta$ | DZ   | Dist.     |
|--------------------------|----------|----------|---------|------|-----------|
| 1A-1A(v)                 | 0.02     | 3.582(3) | 21.94   | 3.32 | 3.17-3.56 |

[a] Symmetry: (v)  $-y - 1, -x + 2, -z + 1/2$ ; (vi)  $-y + 3/2, x + 3/2, z + 3/4$ .  $\alpha$ : dihedral angle between mean planes of the rings (°), DC: distance between ring centroids (Å),  $\beta$ : angle between DC vector and normal to plane(I) (°), DZ: perpendicular distance of the centroids of ring(I) on plane of ring(II) (Å), Dist.: shorter distances between non-hydrogen atoms of rings (I) and (II). [b] Ring: 1A: C1A, C2A, C7A, C8A, C9A, C14A.

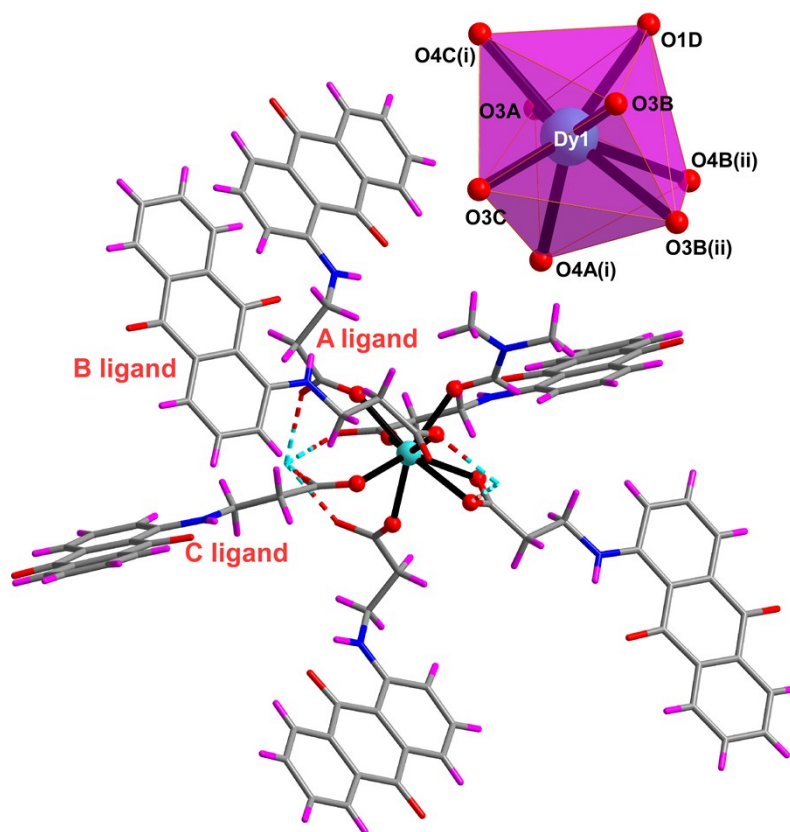

**Figure S12.** Excerpt of the compound 8 showing the two successive dimeric entities of the 1D chain as well as the coordination sphere.

## S14. Continuous shape measures (CShMs)

**Table S2.** Continuous Shape Measurements for Compound **8**.

|          |     |                                            |
|----------|-----|--------------------------------------------|
| OP-8     | D8h | Octagon                                    |
| HPY-8    | C7v | Heptagonal pyramid                         |
| HBPY-8   | D6h | Hexagonal bipyramid                        |
| CU-8     | Oh  | Cube                                       |
| SAPR-8   | D4d | Square antiprism                           |
| TDD-8    | D2d | Triangular dodecahedron                    |
| JGBF-8   | D2d | Johnson gyrobifastigium J26                |
| JETBPY-8 | D3h | Johnson elongated triangular bipyramid J14 |
| JBTPR-8  | C2v | Biaugmented trigonal prism J50             |
| BTPR-8   | C2v | Biaugmented trigonal prism                 |
| JSD-8    | D2d | Snub diphonoid J84                         |
| TT-8     | Td  | Triakis tetrahedron                        |
| ETBPY-8  | D3h | Elongated trigonal bipyramid               |

| OP-8   | HPY-8  | HBPY-8 | CU-8  | SAPR-8       | TDD-8 | JGBF-8 |
|--------|--------|--------|-------|--------------|-------|--------|
| 32.048 | 21.324 | 13.305 | 7.972 | <b>1.642</b> | 2.261 | 14.384 |

| JETBPY- | JBTPR-8 | BTPR-8 | JSD-8 | TT-8  | ETBPY- |
|---------|---------|--------|-------|-------|--------|
| 26.907  | 2.917   | 1.994  | 5.428 | 8.799 | 22.259 |

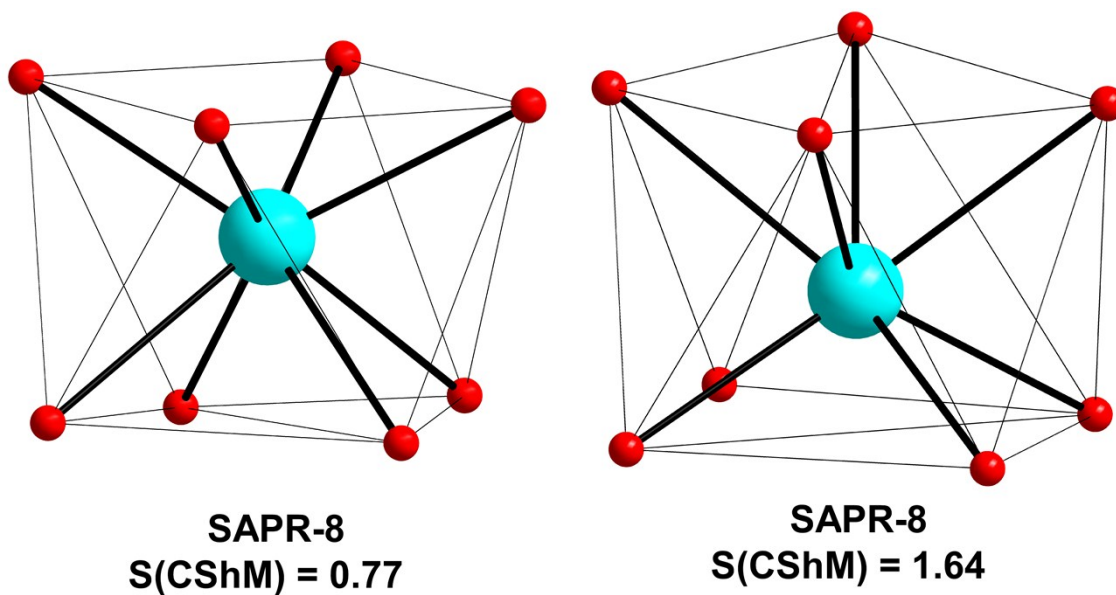

**Figure S13.** DyO<sub>8</sub> coordination environments for compound **8** and {[Dy((NH<sub>2</sub>)<sub>2</sub>-  
 bdc)<sub>1.5</sub>(DMF)<sub>2</sub>]·DMF·H<sub>2</sub>O}<sub>n</sub><sup>4</sup> with their continuous shape measures.



### S15. Powder X-ray Data Collection.

Table S3, S4 and Figure S13 summarize the data resulting from the PXRD pattern-matching analyses performed on compounds **2–9**, which confirm the isostructural nature and purity of all samples.

**Table S3.** PXRD pattern-matching results of compounds **2–5**.

|                     | <b>2</b>                                                         | <b>3</b>                                                         | <b>4</b>                                                         | <b>5</b>                                                         |
|---------------------|------------------------------------------------------------------|------------------------------------------------------------------|------------------------------------------------------------------|------------------------------------------------------------------|
| Empirical formula   | C <sub>54</sub> H <sub>43</sub> N <sub>4</sub> O <sub>13</sub> Y | C <sub>54</sub> H <sub>43</sub> LaN <sub>4</sub> O <sub>13</sub> | C <sub>54</sub> H <sub>43</sub> NdN <sub>4</sub> O <sub>13</sub> | C <sub>54</sub> H <sub>43</sub> EuN <sub>4</sub> O <sub>13</sub> |
| Formula weight      | 1044.84                                                          | 1094.84                                                          | 1100.18                                                          | 1107.90                                                          |
| Crystal system      | triclinic                                                        | triclinic                                                        | triclinic                                                        | triclinic                                                        |
| Space group         | <i>P</i> – <i>1</i>                                              | <i>P</i> – <i>1</i>                                              | <i>P</i> – <i>1</i>                                              | <i>P</i> – <i>1</i>                                              |
| <i>a</i> (Å)        | 8.1575(4)                                                        | 8.154(2)                                                         | 8.154(2)                                                         | 8.154(2)                                                         |
| <i>b</i> (Å)        | 17.4805(8)                                                       | 8.154(2)                                                         | 8.154(2)                                                         | 8.154(2)                                                         |
| <i>c</i> (Å)        | 17.9640(6)                                                       | 20.052(4)                                                        | 20.052(4)                                                        | 20.052(4)                                                        |
| $\alpha$ (°)        | 62.669(2)                                                        |                                                                  |                                                                  |                                                                  |
| $\beta$ (°)         | 80.922(3)                                                        |                                                                  |                                                                  |                                                                  |
| $\gamma$ (°)        | 88.786(2)                                                        |                                                                  |                                                                  |                                                                  |
| V (Å <sup>3</sup> ) | 1260.7(7)                                                        | 1333.3(6)                                                        | 1333.3(6)                                                        | 1333.3(6)                                                        |
| Z                   | 2                                                                | 4                                                                | 4                                                                | 4                                                                |
| Chi <sup>2</sup>    | 1.94                                                             | 2.94                                                             | 2.94                                                             | 2.94                                                             |

**Table S4.** PXRD pattern-matching results of compounds **6–9**.

|                     | <b>6</b>                                                         | <b>7</b>                                                          | <b>8</b>                                                         | <b>9</b>                                                         |
|---------------------|------------------------------------------------------------------|-------------------------------------------------------------------|------------------------------------------------------------------|------------------------------------------------------------------|
| Empirical formula   | C <sub>54</sub> H <sub>43</sub> GdN <sub>4</sub> O <sub>13</sub> | C <sub>54</sub> H <sub>43</sub> N <sub>4</sub> O <sub>13</sub> Tb | C <sub>54</sub> H <sub>43</sub> DyN <sub>4</sub> O <sub>13</sub> | C <sub>54</sub> H <sub>43</sub> ErN <sub>4</sub> O <sub>13</sub> |
| Formula weight      | 1113.19                                                          | 1114.86                                                           | 1118.44                                                          | 1123.20                                                          |
| Crystal system      | triclinic                                                        | triclinic                                                         | triclinic                                                        | triclinic                                                        |
| Space group         | <i>P</i> – <i>1</i>                                              | <i>P</i> – <i>1</i>                                               | <i>P</i> – <i>1</i>                                              | <i>P</i> – <i>1</i>                                              |
| <i>a</i> (Å)        | 8.1575(4)                                                        | 8.154(2)                                                          | 8.154(2)                                                         | 8.154(2)                                                         |
| <i>b</i> (Å)        | 17.4805(8)                                                       | 8.154(2)                                                          | 8.154(2)                                                         | 8.154(2)                                                         |
| <i>c</i> (Å)        | 17.9640(6)                                                       | 20.052(4)                                                         | 20.052(4)                                                        | 20.052(4)                                                        |
| $\alpha$ (°)        | 62.669(2)                                                        |                                                                   |                                                                  |                                                                  |
| $\beta$ (°)         | 80.922(3)                                                        |                                                                   |                                                                  |                                                                  |
| $\gamma$ (°)        | 88.786(2)                                                        |                                                                   |                                                                  |                                                                  |
| V (Å <sup>3</sup> ) | 1260.7(7)                                                        | 1333.3(6)                                                         | 1333.3(6)                                                        | 1333.3(6)                                                        |
| Z                   | 2                                                                | 4                                                                 | 4                                                                | 4                                                                |
| Chi <sup>2</sup>    | 1.94                                                             | 2.94                                                              | 2.94                                                             | 2.94                                                             |

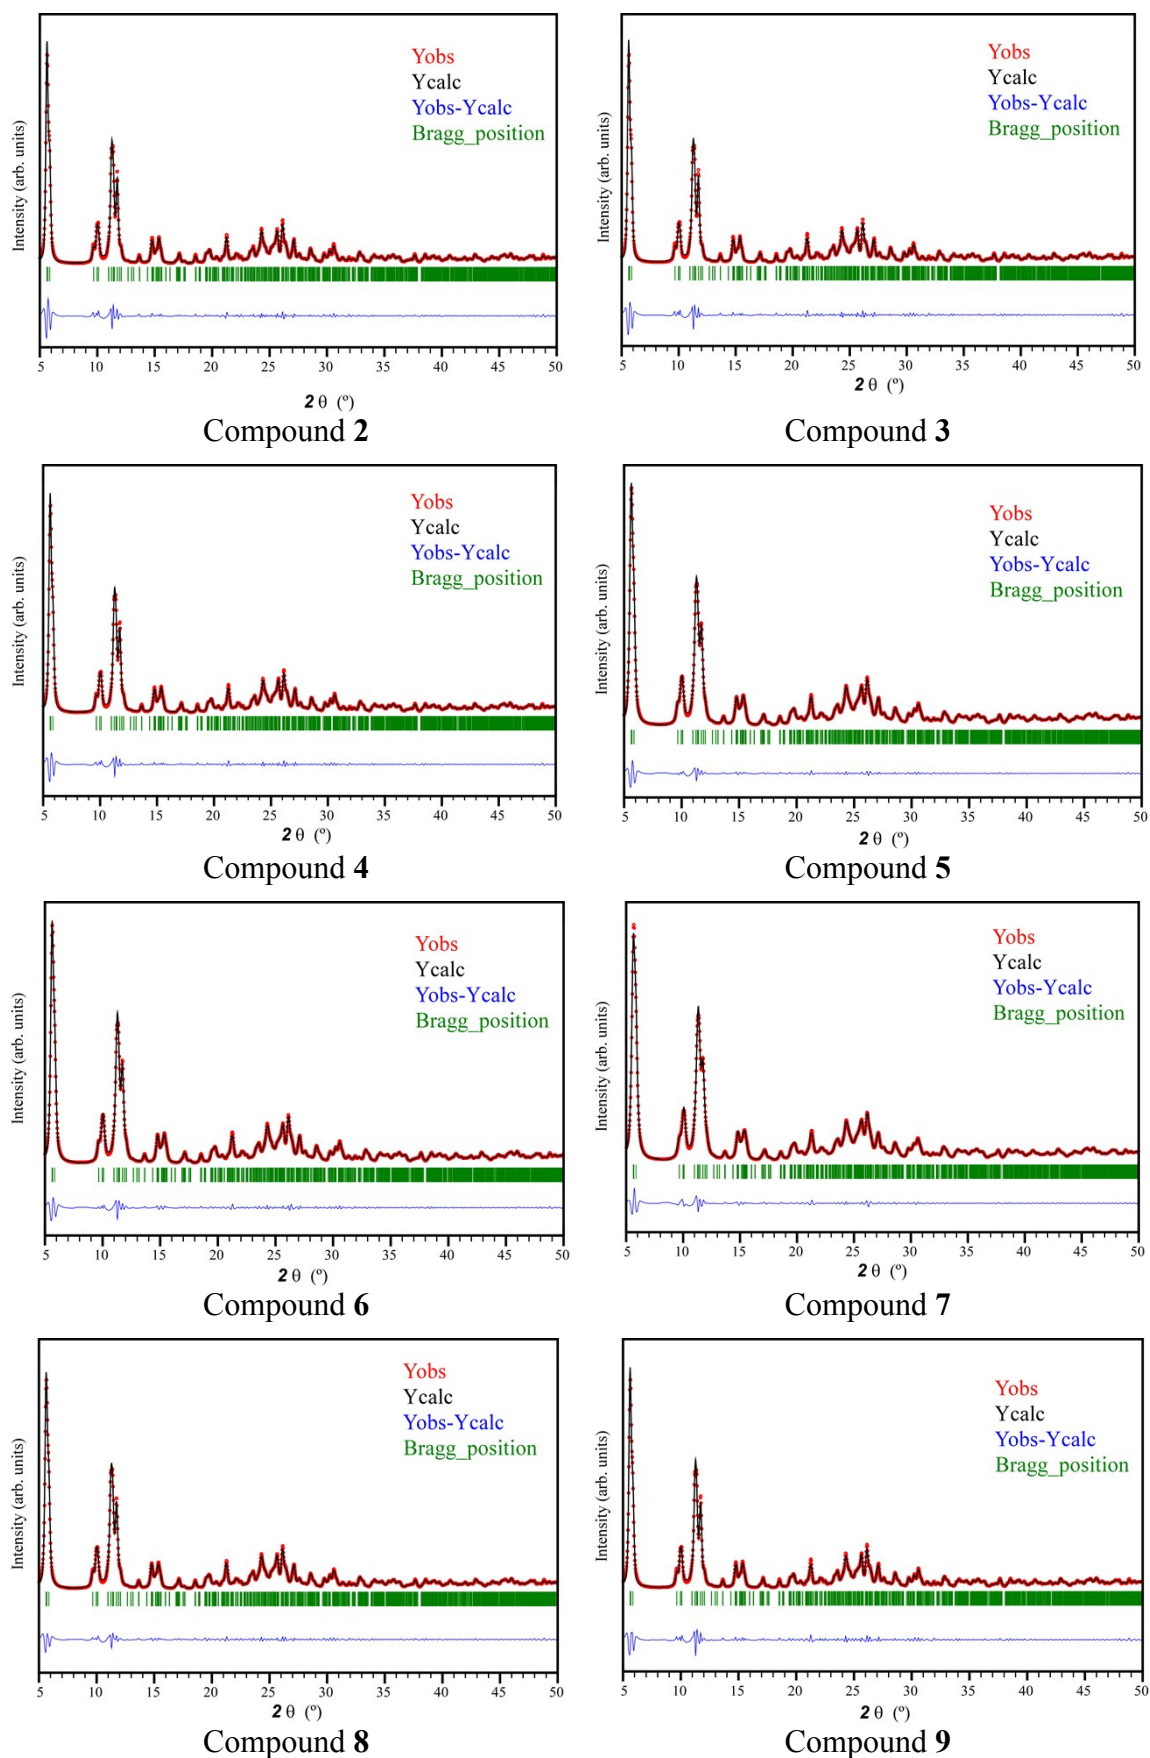

**Figure S14.** Comparison of experimental diffractogram and the theoretical one with their full profile pattern-matching analyses.

## S16. Photoluminescence measurements.

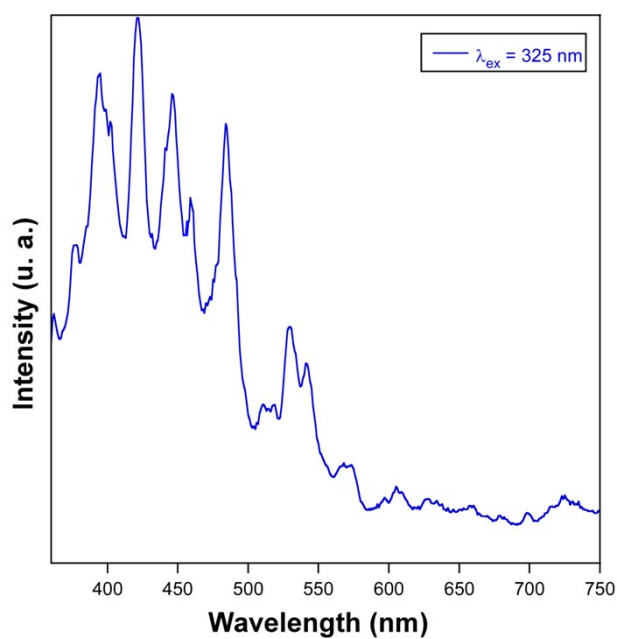

**Figure S15.** Room temperature emission spectra of compound **6** under excitation at 325 nm.

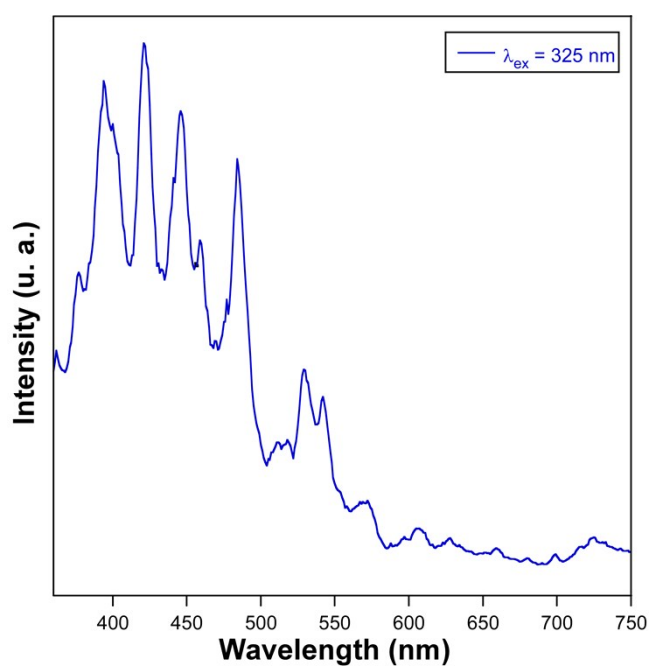

**Figure S16.** Room temperature emission spectra of compound **5** under excitation at 325 nm.

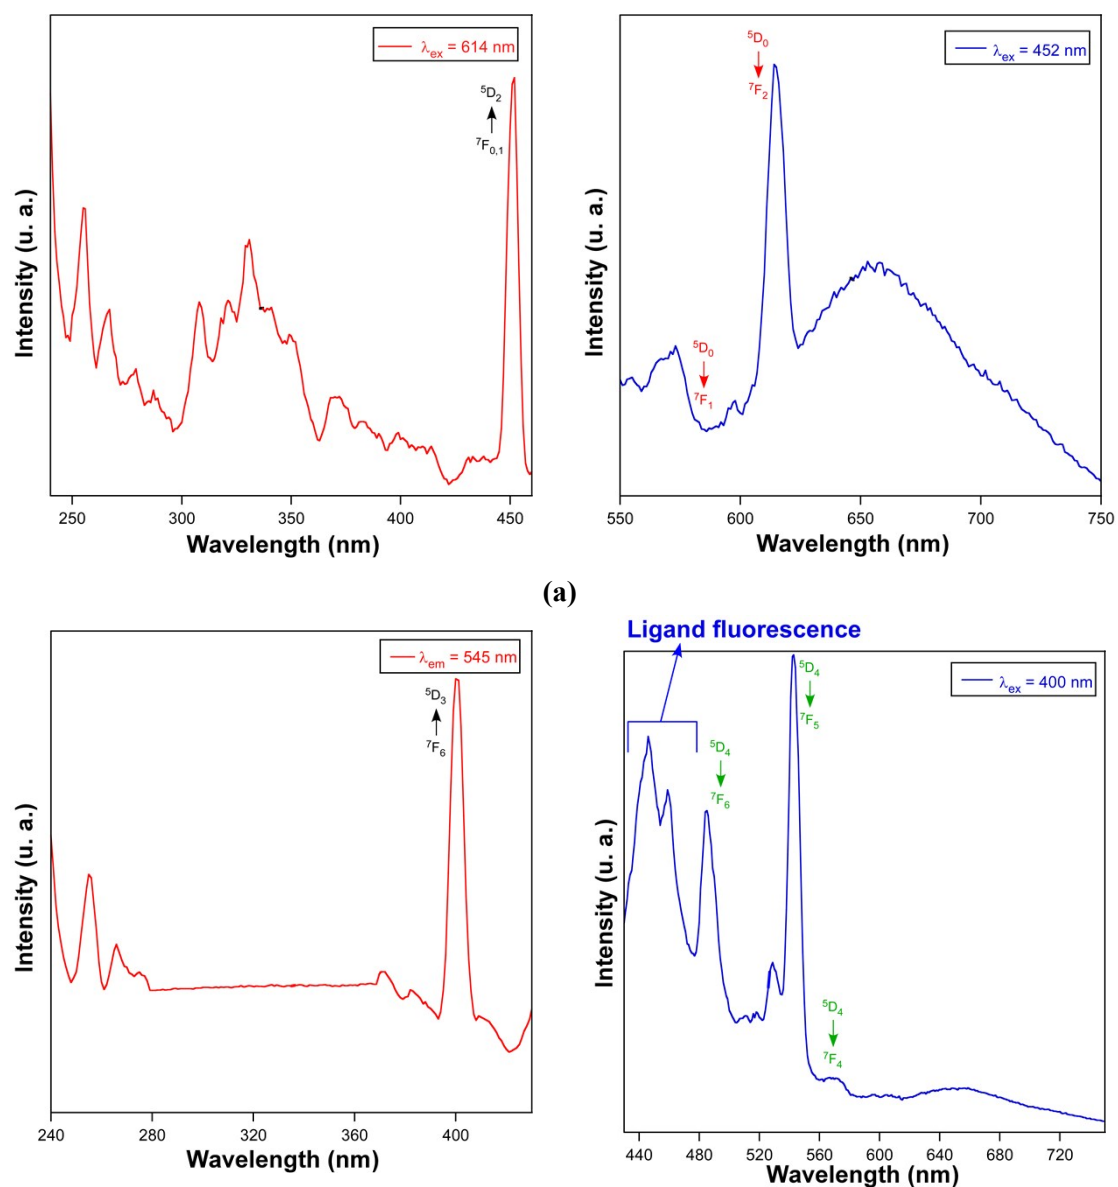

**Figure S17.** Room temperature excitation (red line) and emission (blue line) spectra of compounds (a) 5 and (b) 7.

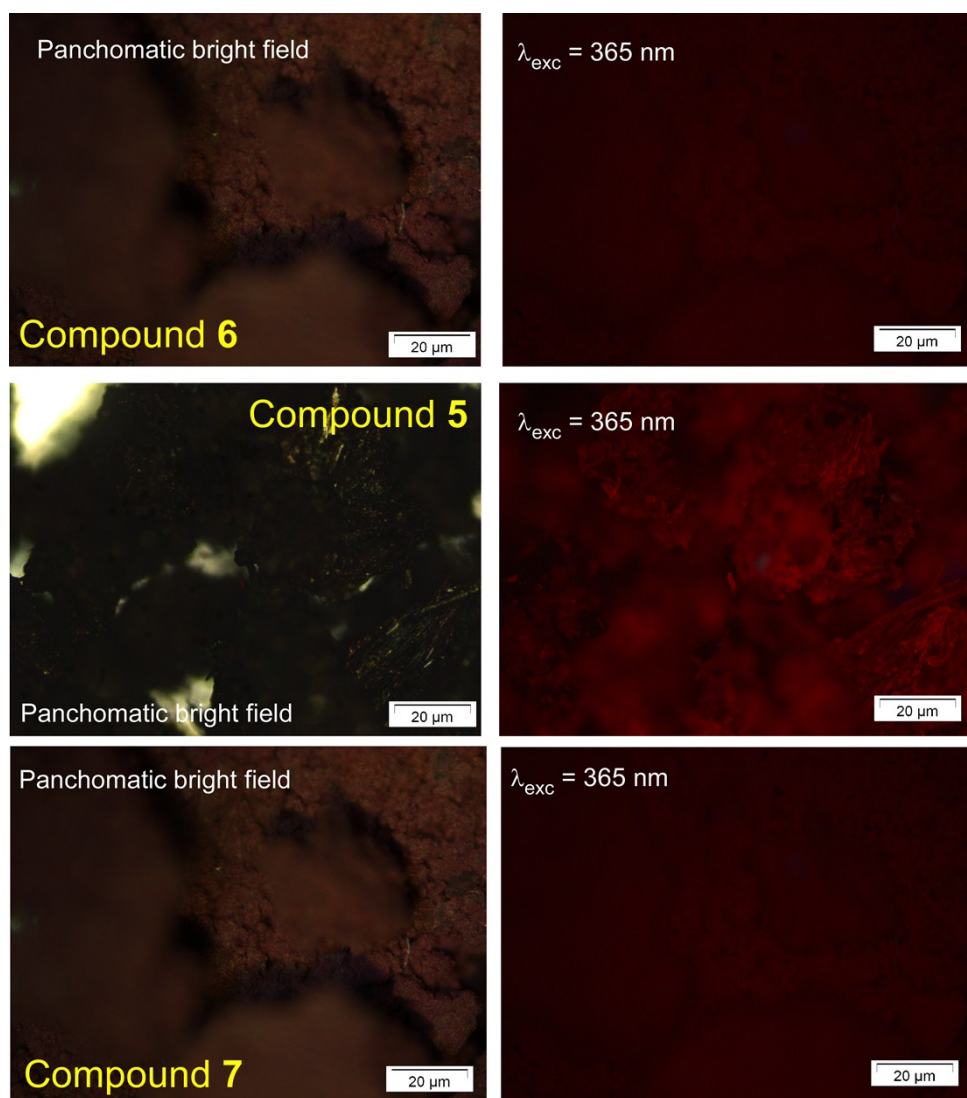

**Figure S18.** Micro-PL images taken on crystals or polycrystalline samples of compounds 5–7 under panchromatic field and UV irradiation ( $\lambda_{\text{exc}} = 365 \text{ nm}$ ).

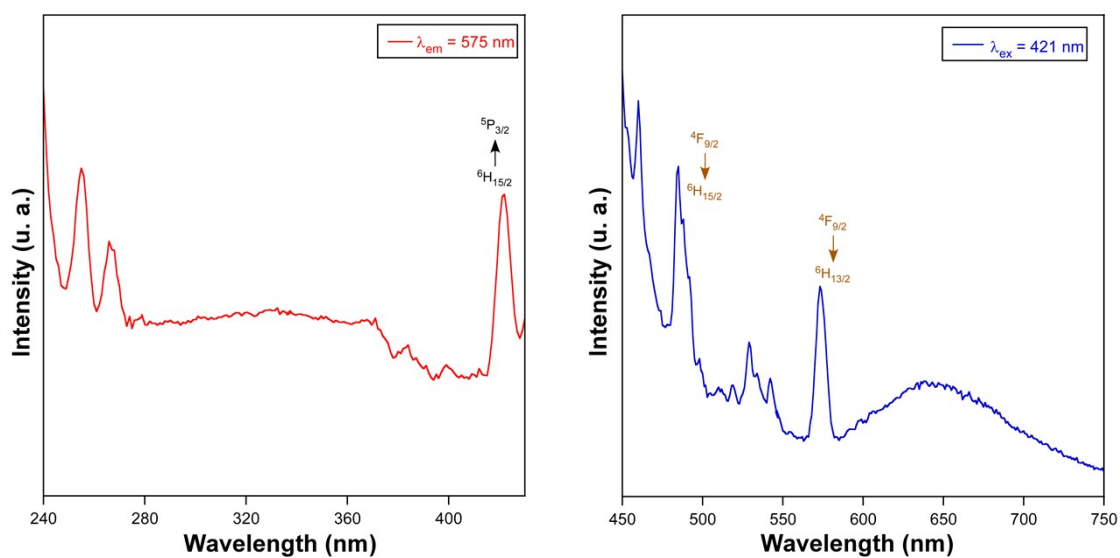

**Figure S19.** Room temperature excitation (red) and emission (blue) spectra of compound 8.

S17. Ac susceptibility measurements.

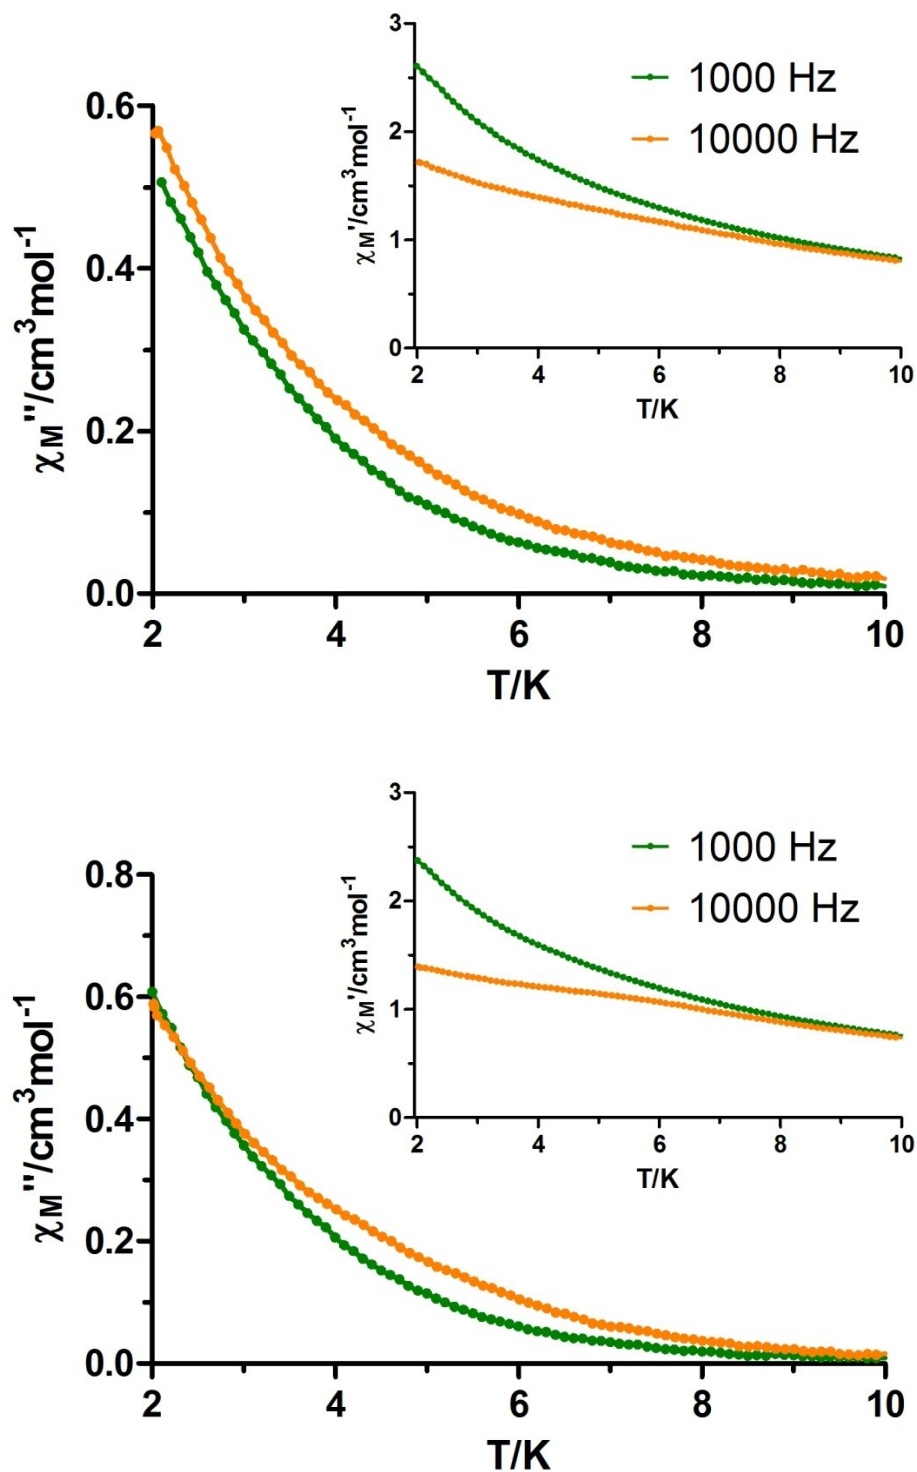

**Figure S20.** Temperature dependence of out-of-phase components of the *ac* susceptibility under 1000 Oe *dc* field for the diluted complexes (Dy:Y of 1:3) (top) and (Dy:Y of 1:6) (bottom). Inset: temperature dependence of in-phase components of the *ac* susceptibility under 1000 Oe *dc* field for the diluted complexes (Dy:Y of 1:3) (top) and (Dy:Y of 1:6) (bottom).



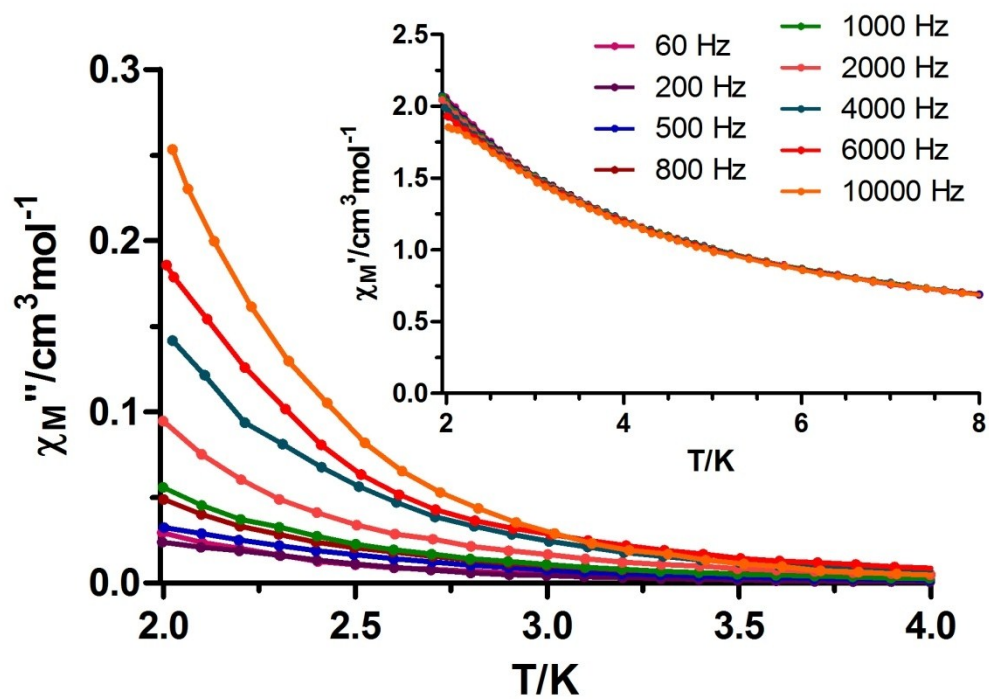

**Figure S21.** Temperature dependence of in-phase (inset) and out-of-phase components of the *ac* susceptibility under 1000 Oe *dc* field for the Er(III) complex.

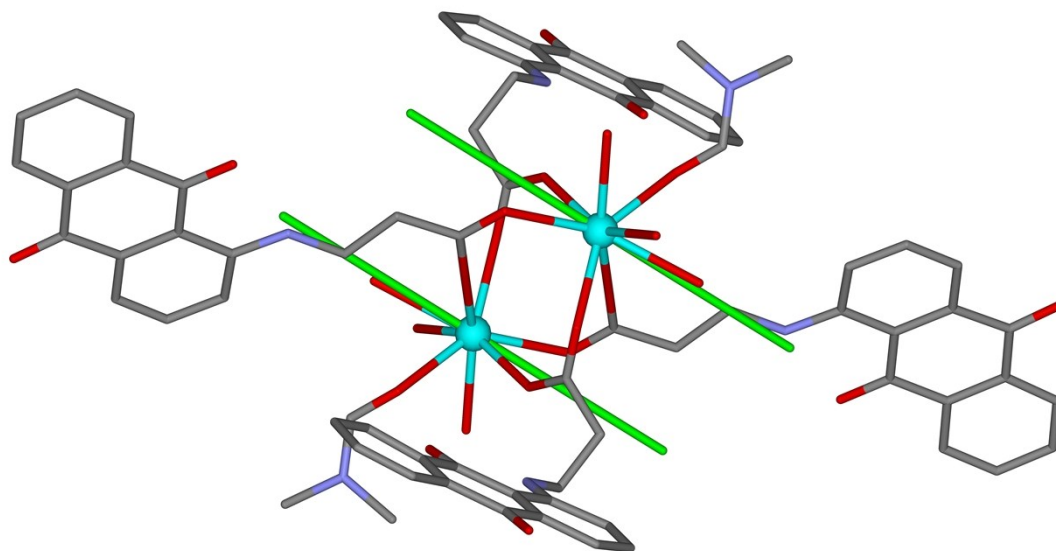

**Figure S22.** Orientation of the magnetic moment (Green line) for compound 8.

**S18. Magneto-caloric effect for gadolinium compound.**

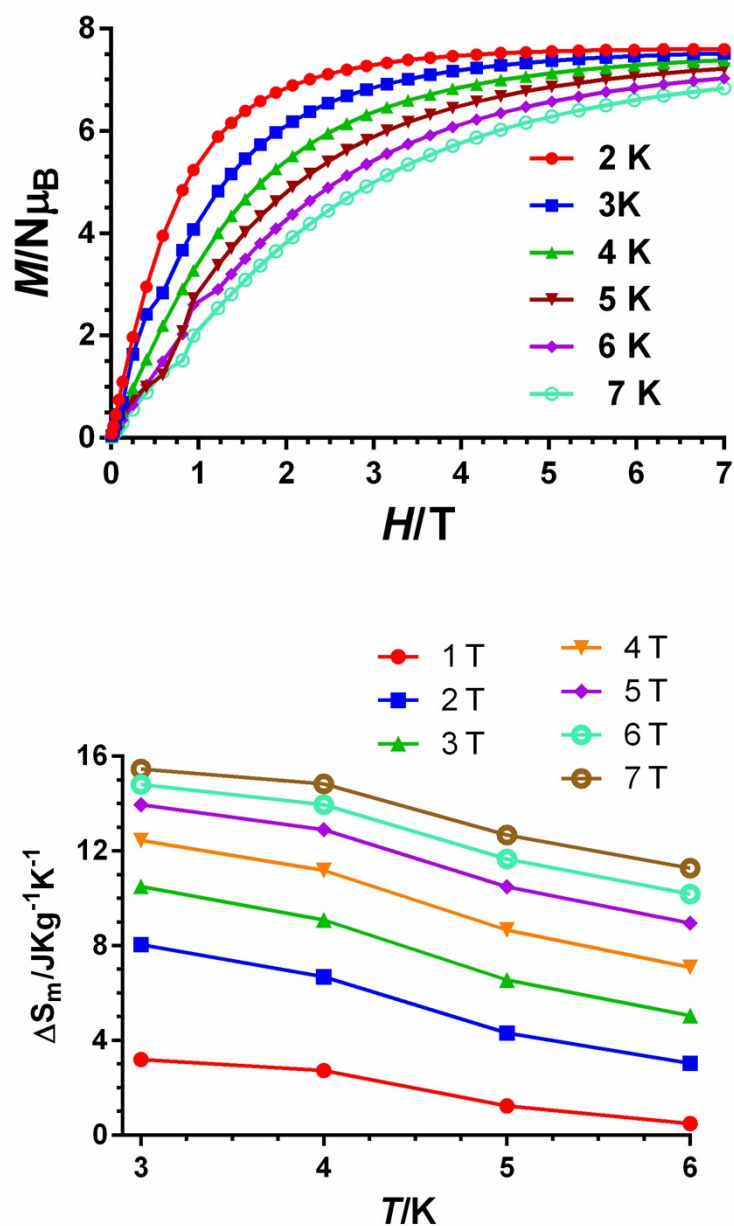

**Figure S23.-** (Top) The field dependence of the magnetization plots for **1** between 2 and 7 K and (bottom) magnetic entropy changes ( $-\Delta S_m$ ) calculated from the experimental magnetization data from 1 to 7 T and temperatures from 3 to 6 K (points). Solid lines are only a guide for the eye.



## REFERENCES

---

- 1 D. H. Wu; A. D. Chen; C. S. Johnson, *J. Magn. Reson. Ser., A* **1995**, *115*, 260.
- 2 DiffAtOnce® is a registered program developed by I. Fernández and F. M. Arrabal-Campos in the University of Almería (Spain). 2013.
- 3 H. J. V. Tyrrell; K. R. Harris, *Diffusion in Liquids*, Butterworths, London, 1984.
- 4 I. Oyarzabal, B. Fernández, J. Cepeda, S. Gómez-Ruiz, A. J. Calahorro, J. M. Seco, A. Rodríguez-Diéguez, *CrystEngComm*, 2016, **18**, 3055.
